# Supplementary material
Source: PubMed Central journal article supplement (PMC7222625)

## SUPPLEMENTARY FIGURE LEGENDS

### Supplementary Figure S1. Micro-C and Hi-C maps of human pluripotent and differentiated cell types. Related to Figure 1.

(A) Examples of intermediate stages of the Micro-C protocol for ESCs (top panel) and HFFs (bottom panel). In both panels, lanes include Marker (M), Input (I), and Proximity Ligation (PL) samples. Key features shown here are the digestion level of Input material to ~90% mononucleosomes, and the shift following proximity ligation to dinucleosome-sized ligation products. Designations above samples (eg R2T1) indicate the biological replicate (R1-3) and technical replicate (T1 etc.) loaded.

(B) Hi-C interaction decay curves for differentiated cells in this study are comparable with prior in situ Hi-C datasets for differentiated cells. Interaction decay curves are shown for in situ Hi-C and Micro-C analysis of HFFs (this study), compared to two published in situ Hi-C datasets for GM12878 cells (Rao et al., 2014).

(C) Interaction decay curves for ESCs showing minor effects of downsampling Micro-C data to match the cis-interacting read depth from the Hi-C dataset (1.09 billion reads).

(D) Interaction decay curve with data renormalized following removal of all interactions between loci closer than 10,000 bp. It is important to note here that removal of interactions from short ranges will by necessity result in an upward shift of the Micro-C curve. This is due to the better coverage of short range interactions in Micro-C relative to Hi-C. The impact of this effect depends on the distance chosen for such an exercise. Micro-C will continue to exhibit lower long-distance (>1 Mb) interactions than Hi-C (as seen here), or ultimately after more aggressive removal of short-range data the ultra-long distance interactions will overlap. However, this would artifactually inflate interactions throughout intermediate distances (~10 kb to 1 Mb) for Micro-C.

In other words, selective read removal followed by normalization could in principle lead to a range spanning three interpretations: Micro-C exhibits equivalent long-distance interactions to Hi-C but much higher intermediate range interactions (short range reads removed), Micro-C exhibits similar mid-range interactions with higher short-range interactions and a lower noise floor (**Figure 1C**), or Micro-C captures more short-range interactions with reduced capture of intermediate range interactions (long range reads removed). In our view the second interpretation, which does not involve arbitrarily choosing interactions to remove and which is presented in **Figure 1C**, is the most natural normalization scheme, but as with any genome-wide dataset it is always valuable to consider effects of normalization on biological interpretations.

(E) Interaction decay curves for Micro-C maps of ESCs. Here, read pairs are separated according to their relative orientation. Note the excess of IN-IN interactions at short distance, attributable to undigested dinucleosomes. Inset shows zoom-in.

(F) As in panel (E) inset, but with reads shifted 73 bp to the nucleosome dyad, thereby aligning IN-IN/IN-OUT/OUT-OUT read pairs.

(G) Step-wise decrease in interactions between adjacent nucleosomes. Each bar shows the ratio of ligation product abundance across two adjacent nucleosomes – the first set of bars shows the ratio of N/N+1 over N/N+2. Bars are shown for IN/IN, IN-OUT, OUT-IN, and OUT-OUT orientations. Notably, there is a greater dropoff from N+1 to N+2, and from N+3 to N+4,

than there is between the nucleosome pairs N+2/3 and N+4/5, potentially consistent with a zig-zag fiber architecture. These data suggest that in humans, in contrast to budding yeast, compacted chromatin fiber may extend beyond tetranucleosomes to organize somewhat longer stretches of the genome. Nonetheless, there is a marked dropoff from N/N+2 to N/N+4 and again from N/N+4 to N/N+6 – whether this represents inefficient extension of chromatin fiber compaction beyond the tetranucleosome, or a technical inability to recover N/N+4 products in a zig-zag fiber thanks to the interposed N+2 nucleosome, remains to be determined, although several independent analyses of in vivo chromatin folding (Ou et al., 2017; Ricci et al., 2015) support the former view: that chromatin forms fairly short, heterogeneous “clumps” of zig-zag fiber in vivo.

(H) Plots show frequency of Hi-C or Micro-C interactions > 10 kb (y axis) for genomic 2 kb bins with varying numbers of DpnII target sequences (x axis), revealing strong bias for poor Hi-C coverage for genomic intervals depleted of DpnII target sites.

### **Supplementary Figure S2. Increased compartmental organization of HFFs. Related to Figure 1.**

(A) Single-gene scale compartment. Left panel shows a broad zoom (chr11: 27,384,310-33,423,664) showing compartment signature (enriched interactions at long distance with the compartment checkerboard pattern) for this gene, while right panel shows the gene-scale zoom-in.

(B) Micro-C contact maps for ESCs and HFFs (above and below the diagonal, respectively) for the indicated chromosomes. The characteristic checkerboard compartment pattern is clearly stronger in HFFs compared to ESCs.

(C-D) Differences in expression between ESCs and HFFs are correlated with changes in compartment organization. Panel (C) shows a typical Volcano plot, in which genes are plotted according to the difference in expression between HFFs and ESCs (x axis) and the p value for the significance of the change in expression (y axis). Dots are colored according to the compartment change for each gene between the two cell types – red dots show genes preferentially located in the active compartment in ESCs relative to HFFs, and these genes are primarily those that are more highly-expressed in ESCs. This was highly statistically-significant: confining the analysis to highly induced/repressed genes ( $\log_2(\text{fold change}) > 5$  and  $-\log_{10}(\text{p-value}) > 5$ ), we find a Spearman Correlation of 0.469 between changes in mRNA abundance and compartment score, with a p-value of  $1.18\text{e-}139$ . Panel (D) shows a compartment-focused analysis, with each gene's relative ranking in compartment score (higher = enriched in active compartment) plotted for the two cell types. Genes are colored by the difference in expression between ESCs and HFFs. Again, genes with higher active compartment scores in HFFs (dots in the lower right corner) are enriched for genes that are activated in HFFs vs. ESCs (blue dots), and vice versa.

### **Supplementary Figure S3. Characterization of boundaries between contact domains. Related to Figures 2 and 3.**

(A) Near-diagonal interactions at TSSs broken down by gene orientation and expression level. Top and bottom panels show all + and - strand genes, respectively. For each group, three panels are shown for low, intermediate, and high expression as defined by CAGE-Seq data (ENCODE accession# ENCFF038OTF). Notable here is the well-positioned nucleosome apparent at the +1 position, and the increased boundary-related “clearing” in the lower left/upper right quadrants at increased transcription rates. Also curious is the asymmetry in boundary-crossing interactions, with the +1 nucleosome interacting with upstream sequences but little to no interaction of -1/-2 nucleosomes with the downstream coding sequence.

(B) Boundary calls are not sensitive to parameter choice. Boundaries were identified using a sliding window approach in which, for any given locus, the number of crossing interactions was calculated within some distance, relative to interaction frequency in windows on either side of the locus. Boundaries are identified as local minima in this insulation score. This approach has two free parameters: data bin size, and width of the sliding window. Here, boundaries were calculated using one set of parameters (100 bp bins, 1000 bp window), and insulation scores are shown in heatmaps for these and two additional parameter choices.

(C) Insulation scores scale with promoter transcriptional activity. Here, we analyzed all annotated promoters in human, splitting promoters into quintiles based on the mRNA abundance of the downstream gene in either ESCs or HFFs (Quintile 1 = highest expression, Quintile 5 = lowest). For each quintile, the distribution of Micro-C insulation scores (negative = stronger insulation) is shown as a violin plot, revealing a strong overall relationship between promoter activity and insulation.

(D) Changes in transcription during differentiation are accompanied by changes in promoter insulation scores. Scatterplot shows insulation scores at all promoters exhibiting a 2-fold change in expression between ESCs and HFFs, comparing insulation scores in Micro-C datasets for HFFs (x axis) and ESCs (y axis). Dots are color-coded by changes in associated mRNA abundance, with genes upregulated in HFFs colored red and those downregulated in HFFs colored blue. Although insulation scores are generally well-correlated between cell types (dots along diagonal), two prominent groups of promoters fall off the diagonal, with HFF-upregulated promoters showing stronger insulation in HFFs, and HFF-downregulated promoters losing insulation activity.

(E) Overview of molecular features of weak boundaries. Heatmap from **Figure 3G**, with complete list of all feature enrichments at Cluster IV boundaries.

(F) Boundary-level view of molecular correlates of weak boundaries. Heatmaps show ChIP (or DNase) signal for Cluster IV boundaries from **Figures 3E-G**. Several features, notably nuclease hypersensitivity, are associated with weak boundary elements.

#### **Supplementary Figure S4. Examples of enhancer-promoter and Polycomb-mediated looping interactions. Related to Figure 4.**

(A-B) Contact maps are shown (rotated 45 degrees) for the indicated genomic intervals showing enhancer-promoter interactions (A) or Polycomb-associated interactions (B), along with public data for CTCF and select other marks related to chromosome architecture. A subset of looping

interactions are indicated with arrowheads, highlighting examples both of loops linking CTCF binding sites, as well as CTCF-depleted looping interactions.

(C) Loop averages for HFFs. Data for Hi-C only, Micro-C only, and shared loop anchors are shown as in **Figure 4C**, but for the HFF dataset.

#### **Supplementary Figure S5. CTCF-associated looping interactions. Related to Figure 4.**

(A) Distribution of CTCF ChIP-Seq enrichment for all ESC loop anchors, compared to CTCF ChIP enrichment for an equal number of loci randomly shifted by distances between 80-160 kb from loop anchors.

(B-C) Loop averages in ESCs for CTCF motif pairs in all four orientations for the Hi-C dataset. (B) shows data for 40 kb windows surrounding CTCF motifs, while (C) shows a 3 kb zoom-in.

(D-E) Loop averages for the Micro-C dataset, arranged as in panels (B-C). Notable here is the presence of signal for all four motif orientations, with asymmetric loop extrusion flares in the two tandem orientations consistent with CTCF motifs oriented “towards” a loop extruder exerting much stronger barrier activity than outwardly-oriented CTCF motifs. In addition, although “blurry” signal is apparent in Hi-C maps at lower resolution (compare (B) and (D)), the signal is much sharper in Micro-C maps at this resolution. At the higher resolution shown in (C) and (E), the blurring of the Hi-C signal almost completely obscures loop anchors, while these are clearly resolved in the Micro-C dataset.

#### **Supplementary Figure S6. Molecular characteristics of loop anchors. Related to Figure 4.**

(A) Heatmap from **Figure 4E** is reproduced here in greater detail

(B-C) Chromatin states for CTCF-enriched and -depleted loop anchors, using two different definitions for CTCF enrichment/depletion (see **Supplementary Figure S5A**) as indicated.

#### **Supplementary Figure S7. Looping interactions at CTCF-depleted loci. Related to Figure 4.**

(A) Average contact maps for TSSs (center of x axis) with the nearest enhancer, in both cases excluding regulatory elements overlapping with a significant CTCF ChIP-Seq peak. TSSs are sorted into quintiles based on PolII ChIP-seq signal at promoters.

(B) Loops between paired sites for various structural proteins and histone marks. In all cases, we first excluded ChIP peaks for these factors if they fell within 10 kb of a CTCF peak. From this set of peaks, heatmaps show averaged signal for peak pairs falling farther than 5 kb from one another. Red labels indicate factors with <500 peaks in this analysis.

Figure S1

A

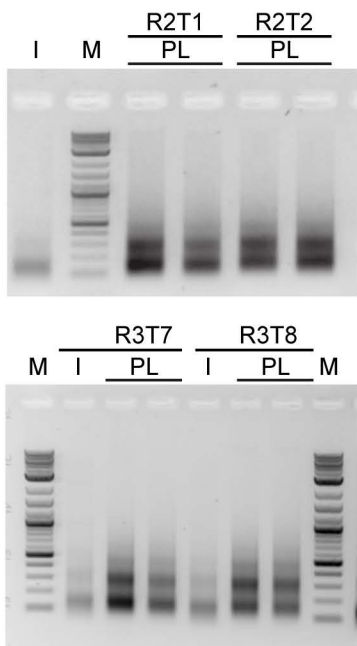

B

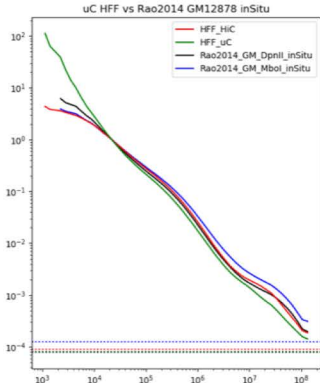

C

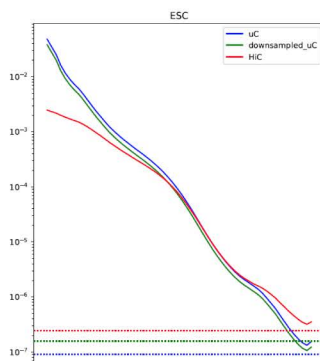

D

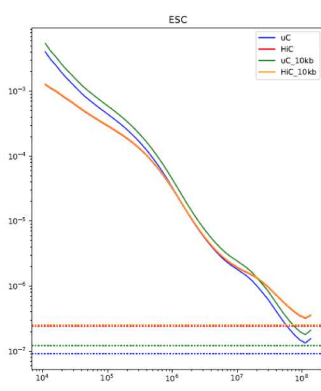

E

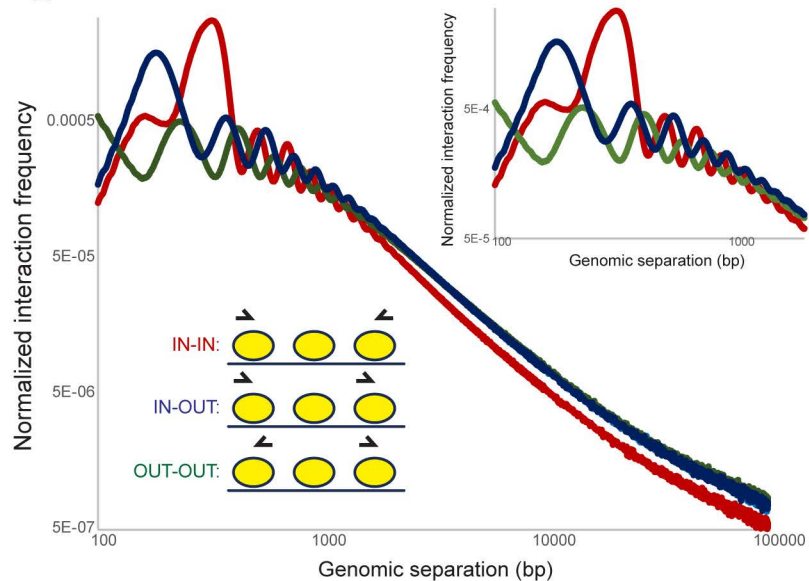

F

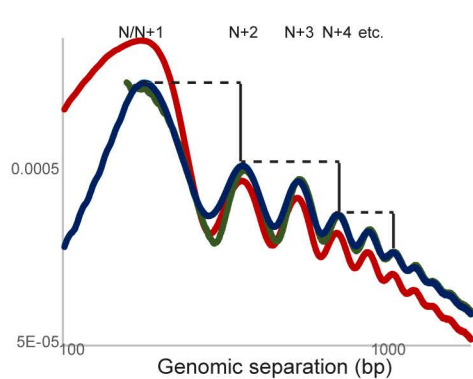

G

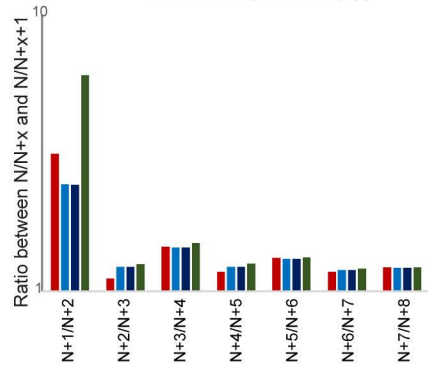

H

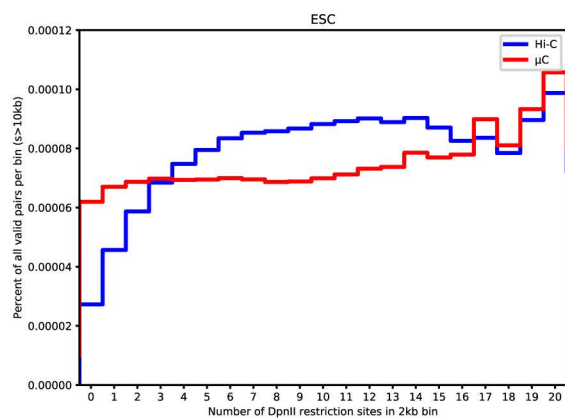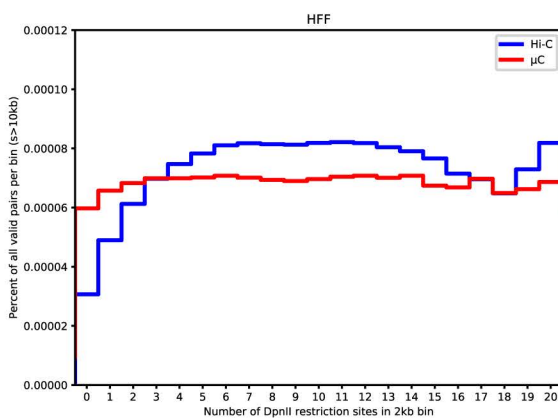

Figure S2

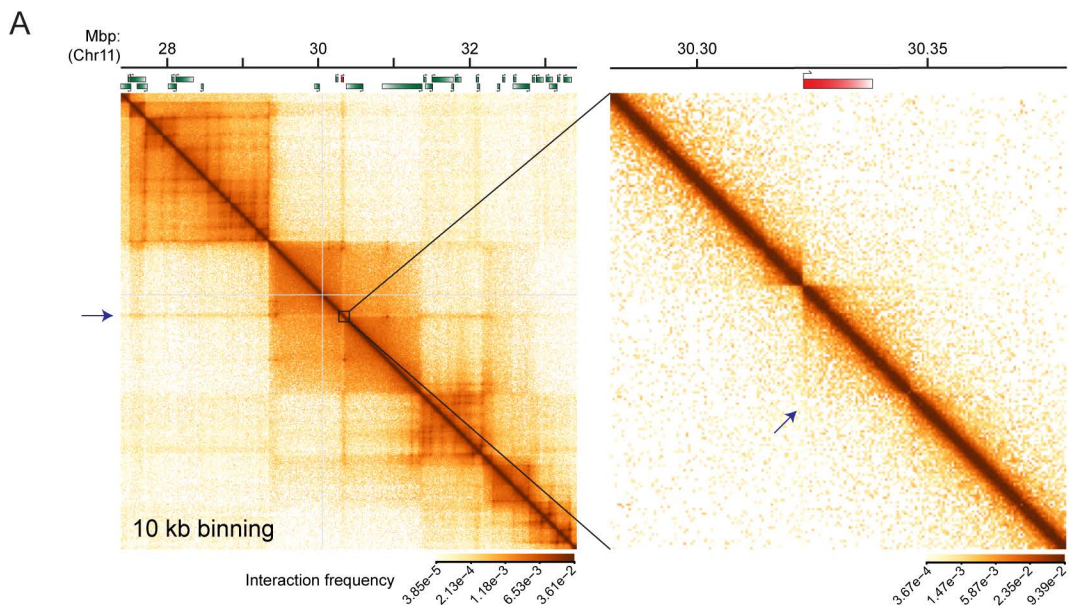

**B**

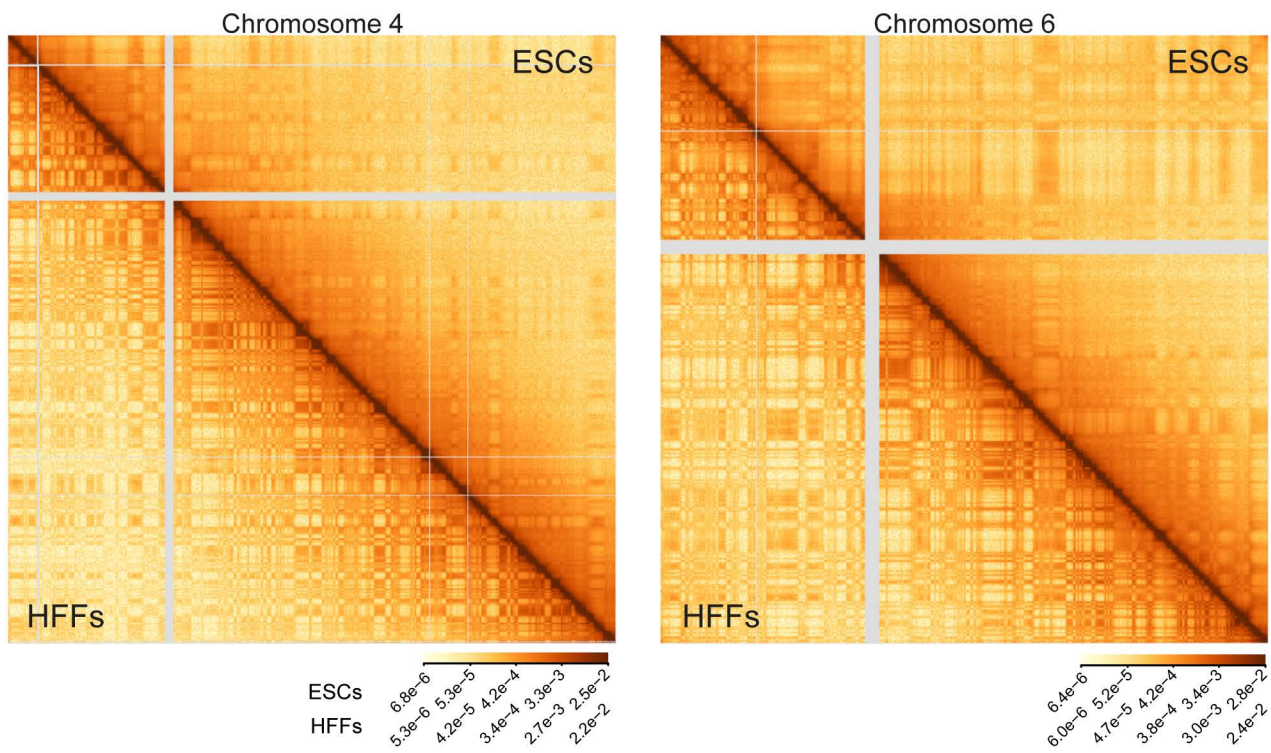

**C**

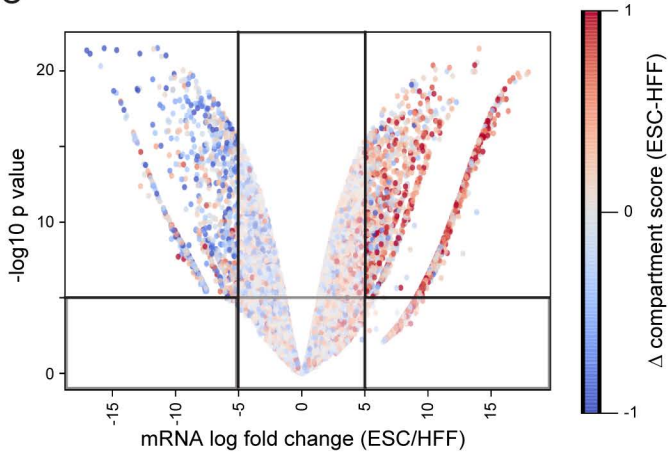

**D**

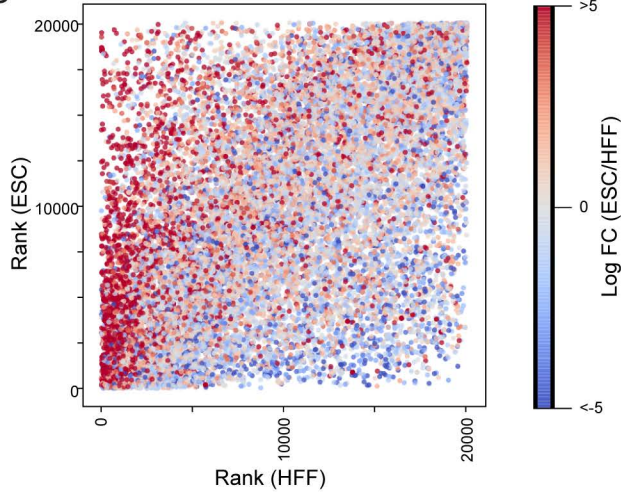

Figure S3

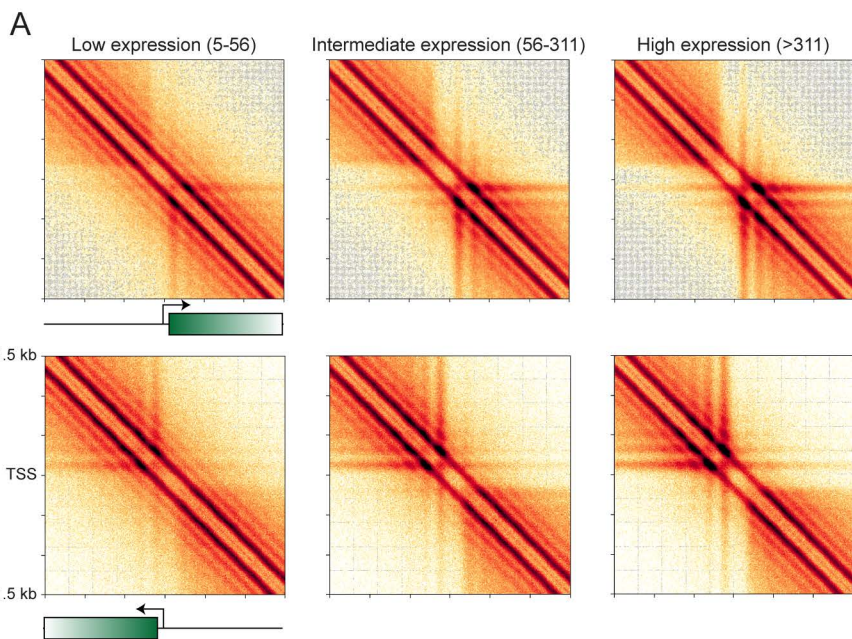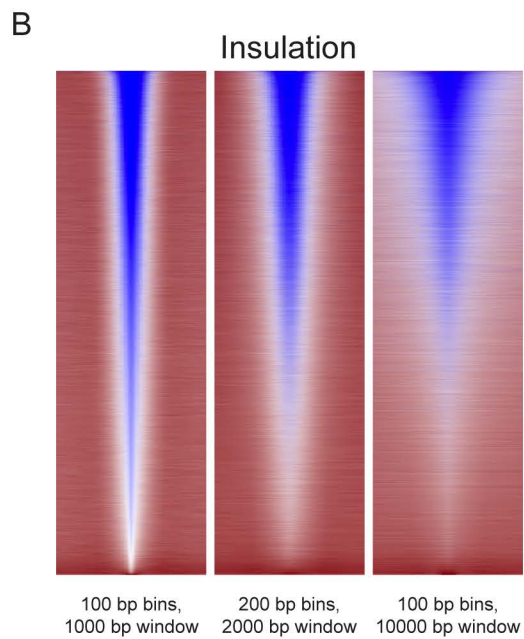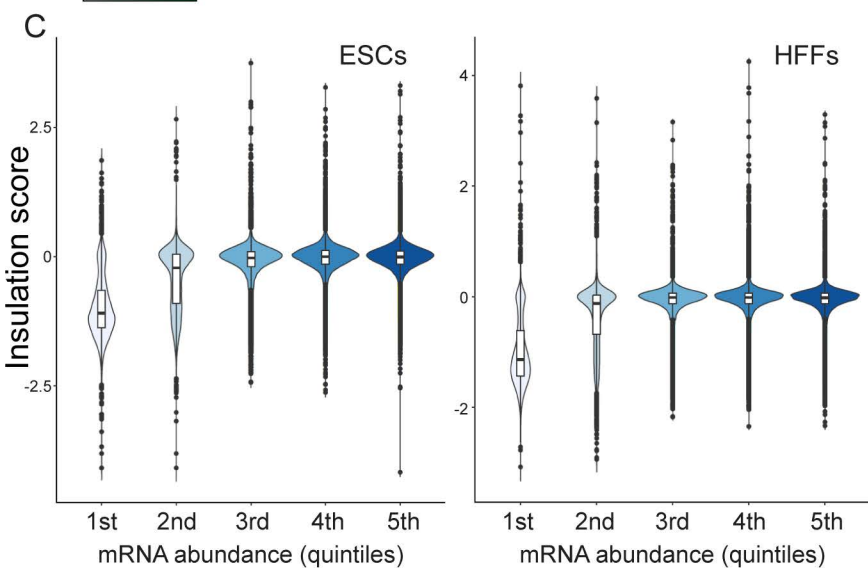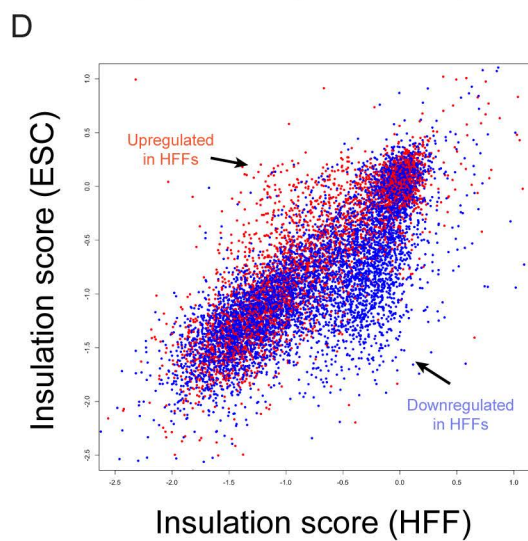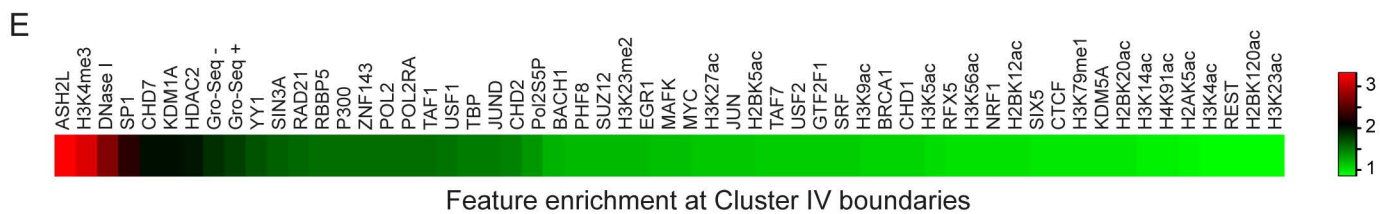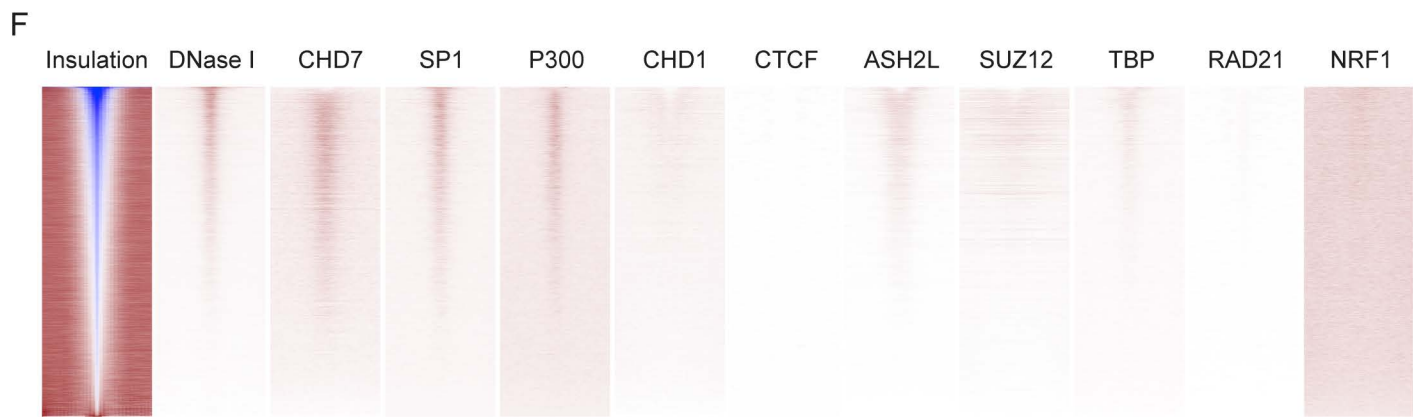

Figure S4

A

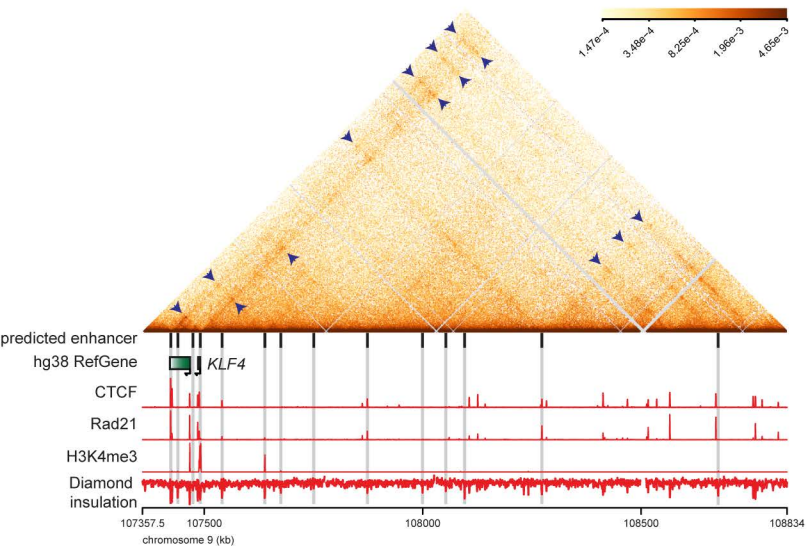

C

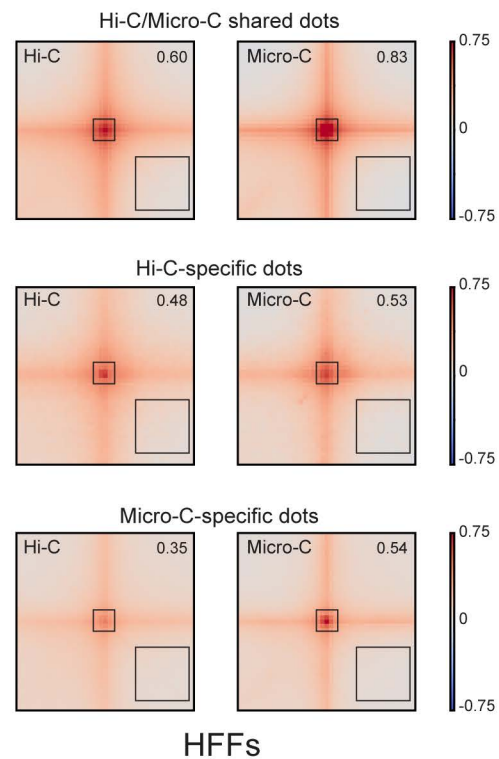

B

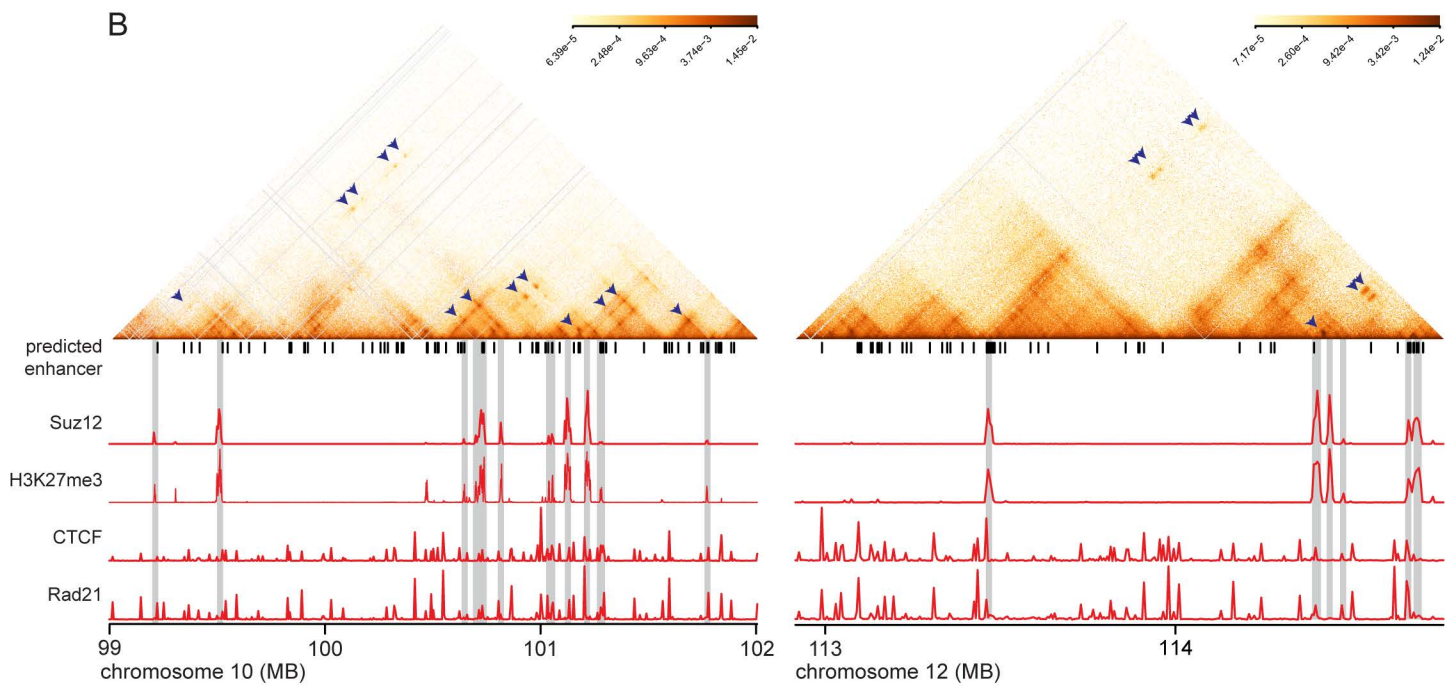



Figure S5

A

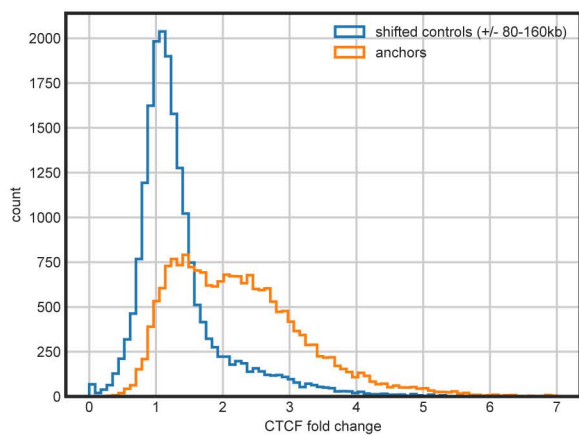

B Hi-C

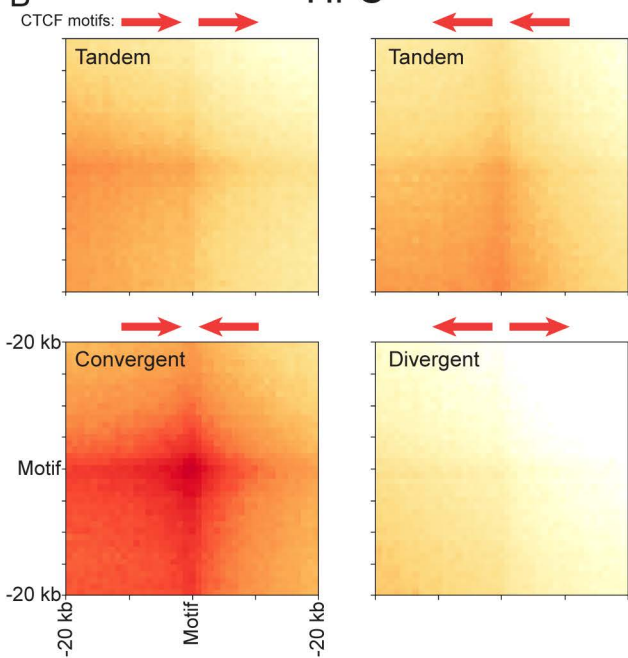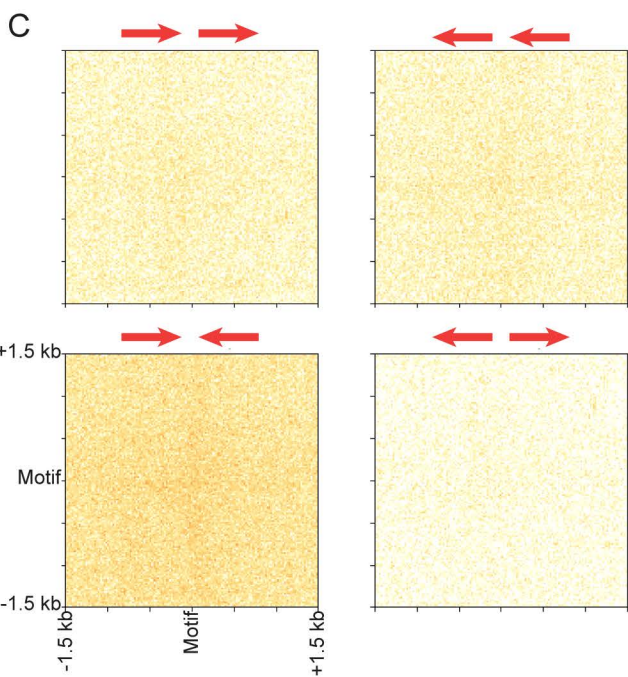

D Micro-C

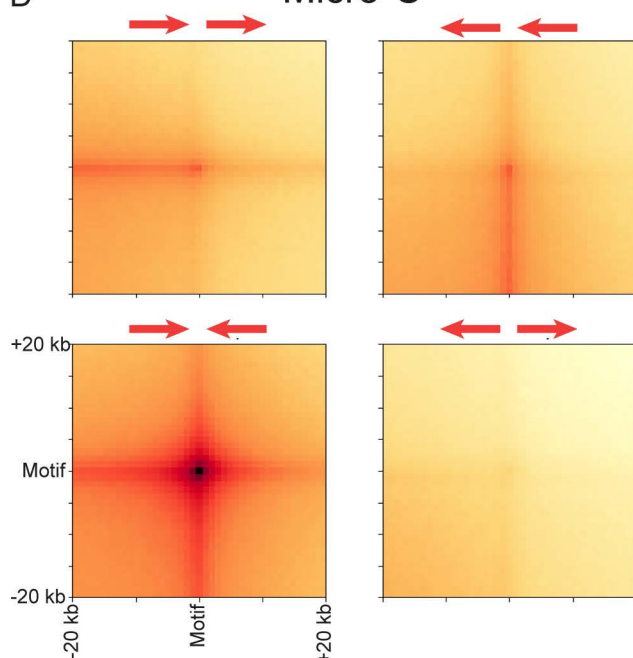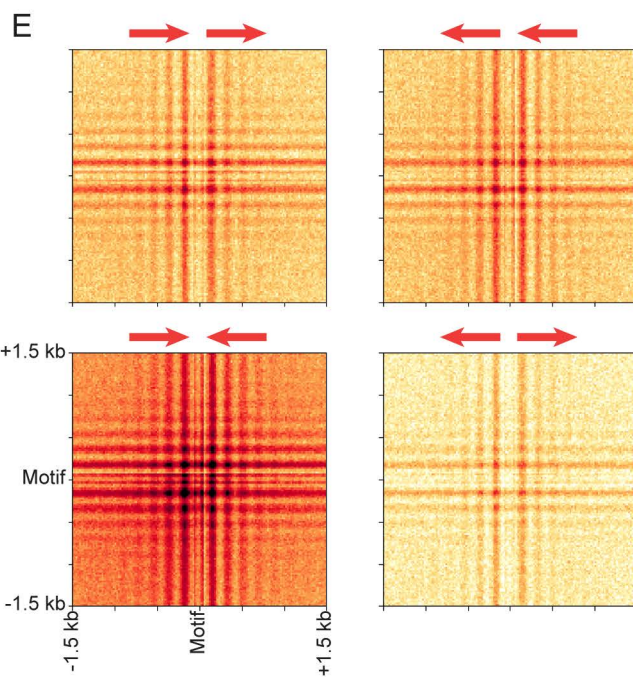

Figure S6

A

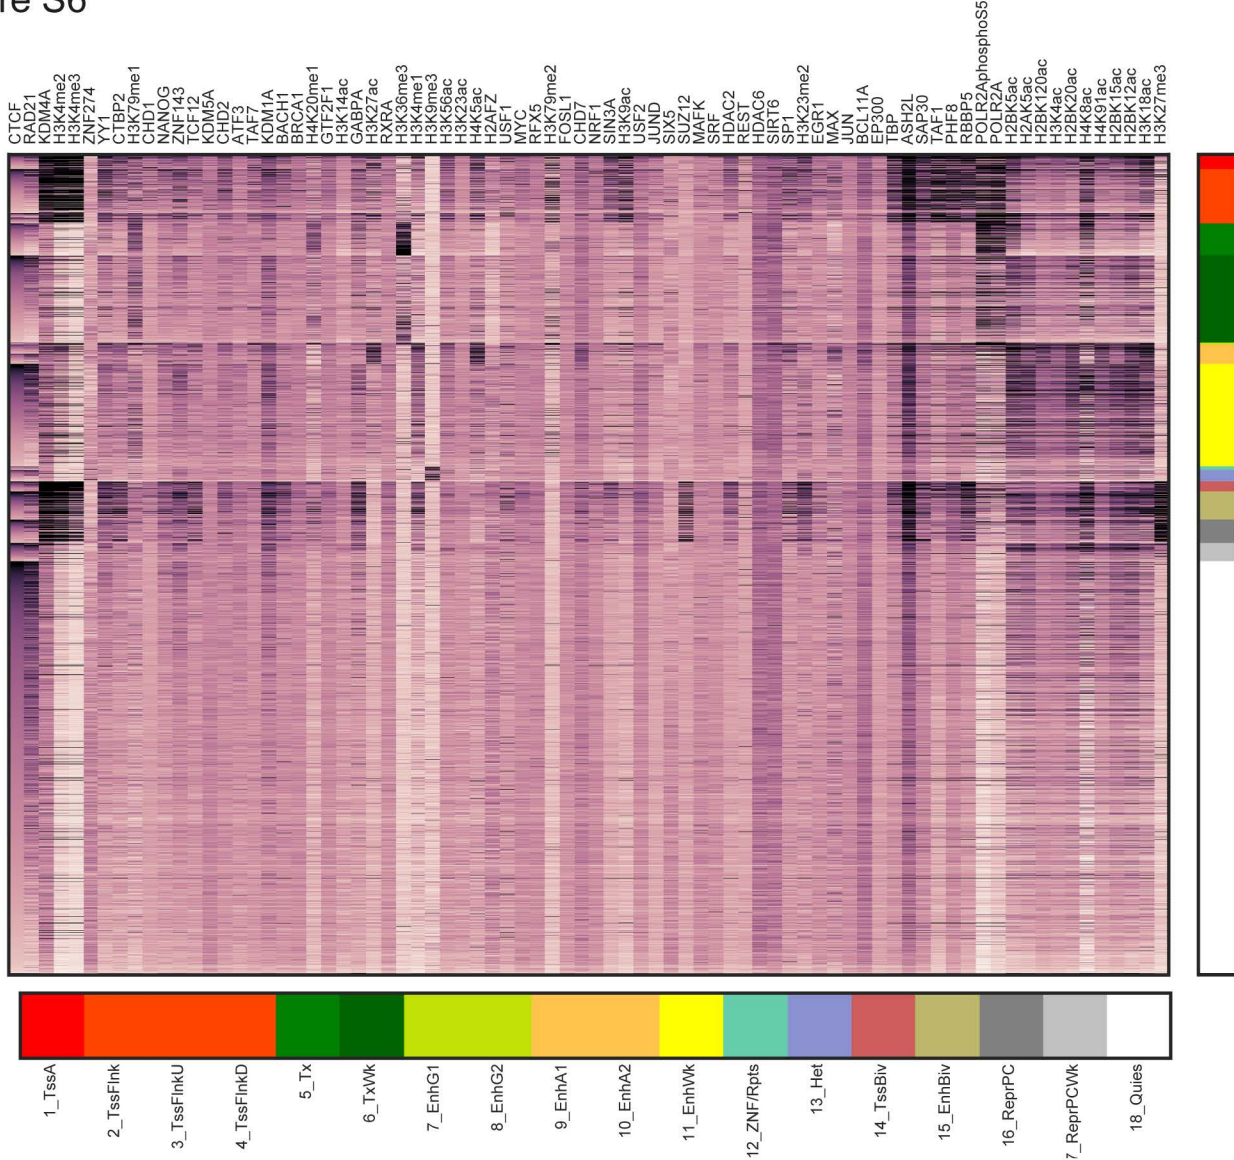

B

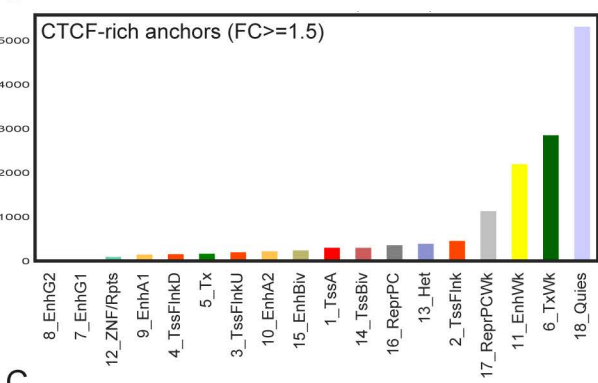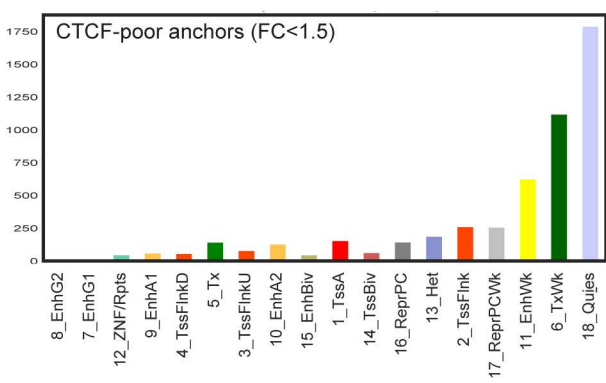

C

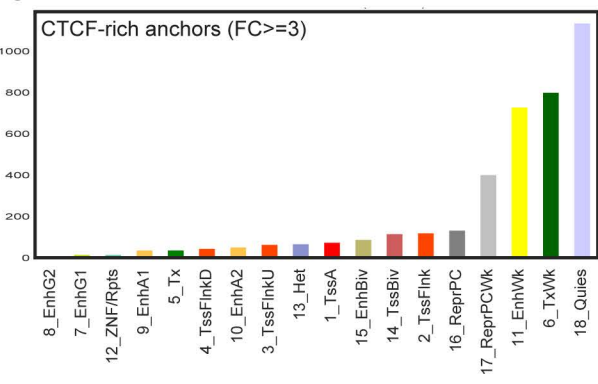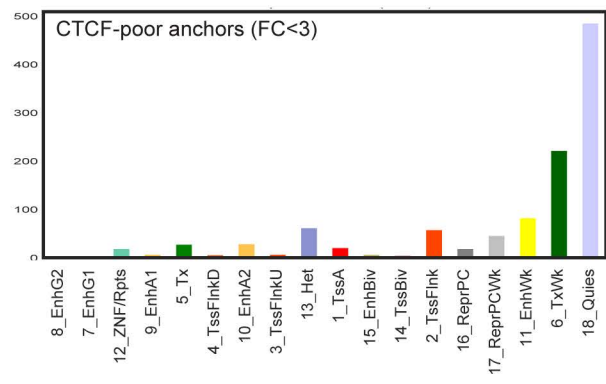

Figure S7

A

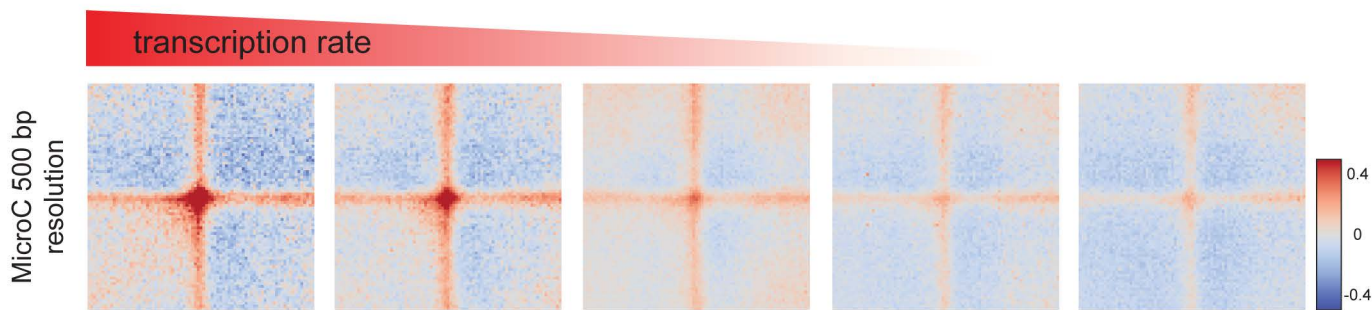

B

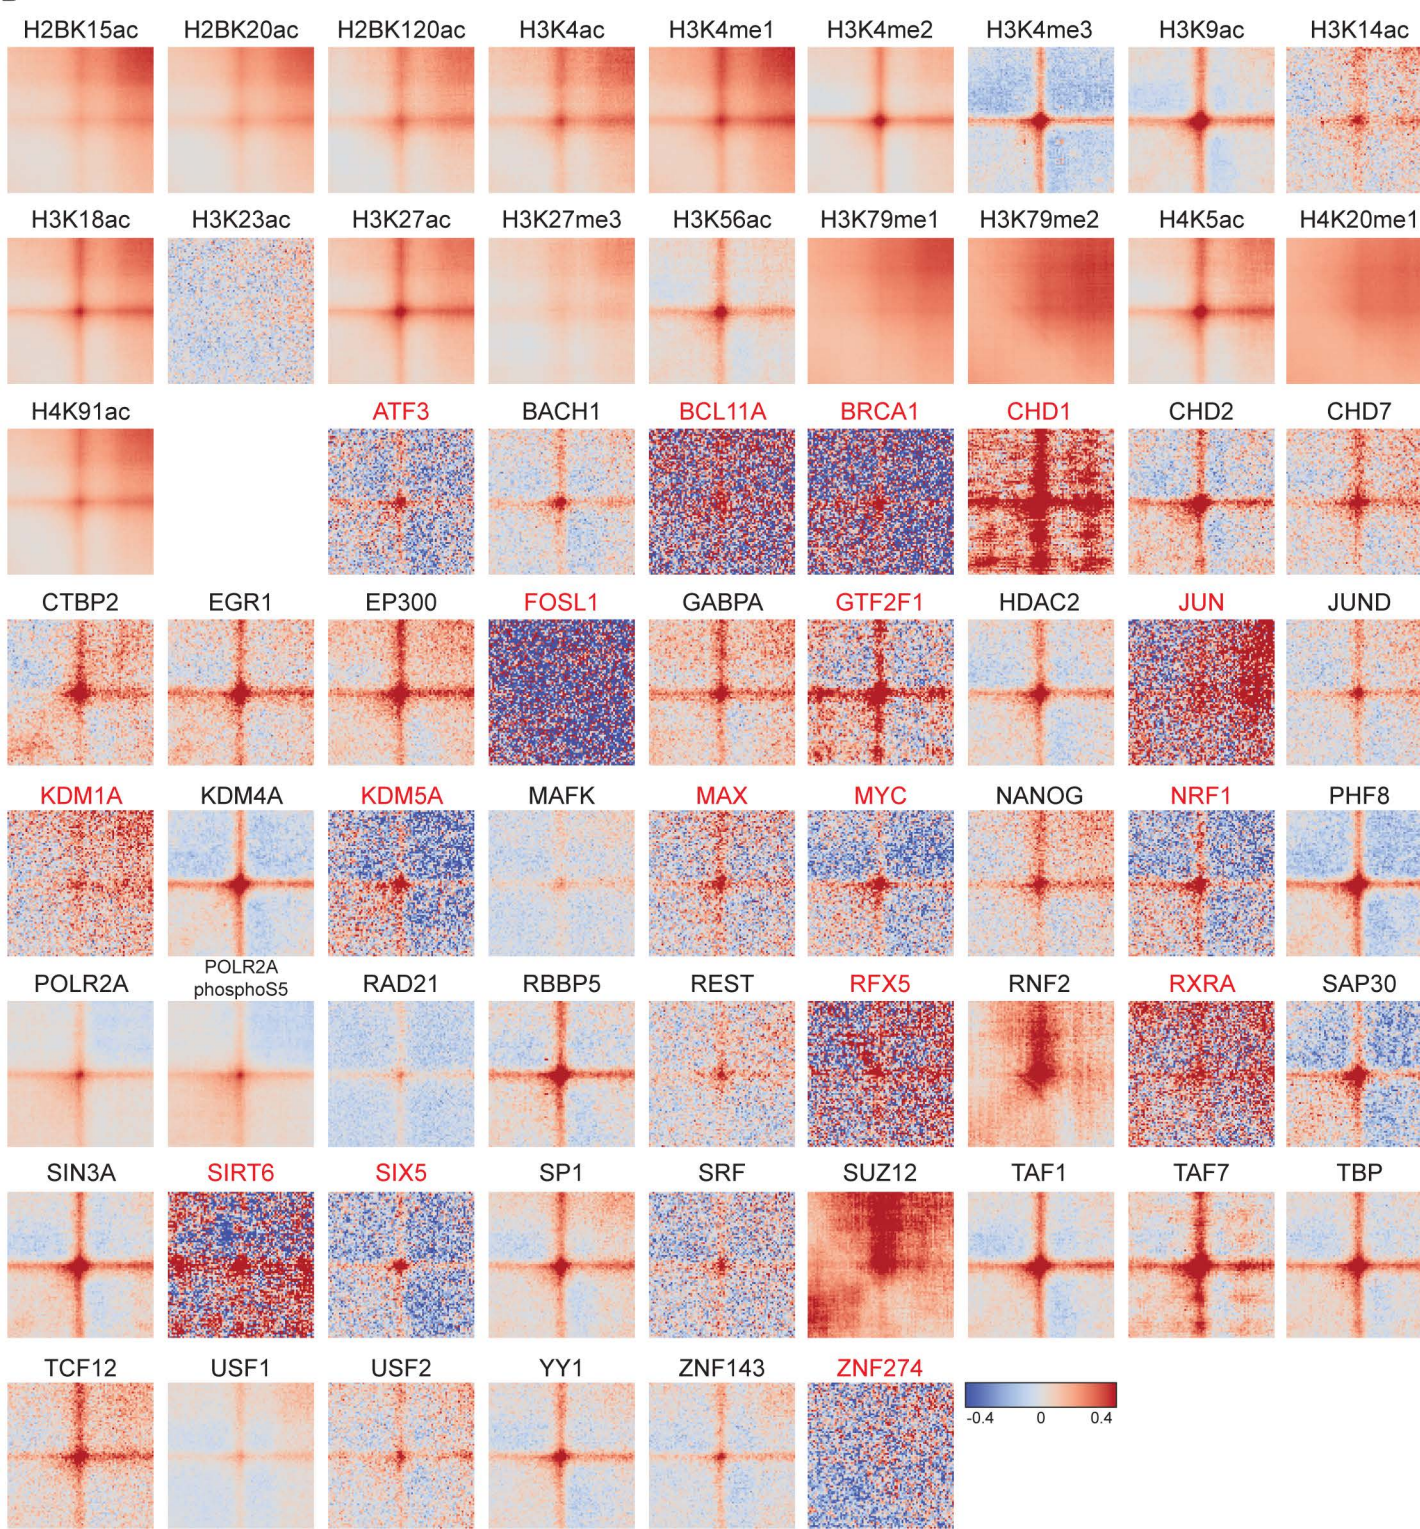

Supplement: NIHMS1574796-supplement-2.pdf [file NIHMS1574796-supplement-2.pdf]
